# Supplementary material for: Hydrogen-bonded six-component assembly for capsule formation based on tetra(4-pyridyl)cavitand and isophthalic acid linker and its application to photoresponsive capsule
Source: Royal Society of Chemistry journal article supplement (doi:10.1039/c8ob02115e), 2018-01-01
Supplement: c8ob02115e1.pdf [file c8ob02115e1.pdf]

## Electronic supplementary information

### Hydrogen-bonded six-component assembly for capsule formation based on tetra(4-pyridyl)cavitand and isophthalic acid linker and its application to photoresponsive capsule

Yuka Togari, Shiori Hirota, Hitomi Kitagawa, Yoshimi Tsukamoto and Kenji Kobayashi\*

Department of Chemistry, Faculty of Science, Shizuoka University, 836 Ohya, Suruga-ku, Shizuoka 422-8529, Japan.

E-mail: kobayashi.kenji.a@shizuoka.ac.jp

#### Contents

- General
- **Schemes S1 and S2** Synthetic routes of **2a** and *trans*-**2b**.
- Synthetic procedures and spectral data of **2a** and *trans*-**2b**.
- **Fig. S1** <sup>1</sup>H and <sup>13</sup>C NMR spectra of **2a'**.
- **Fig. S2** <sup>1</sup>H and <sup>13</sup>C NMR spectra of **2a**.
- **Fig. S3** <sup>1</sup>H and <sup>13</sup>C NMR spectra of **6**.
- **Fig. S4** <sup>1</sup>H and <sup>13</sup>C NMR spectra of *trans*-**2b'**.
- **Fig. S5** <sup>1</sup>H and <sup>13</sup>C NMR spectra of *trans*-**2b**.
- **Fig. S6** DOSY NMR spectra of (a) **1<sub>2</sub>•2a<sub>4</sub>** and (b) **G1@(**1<sub>2</sub>•2a<sub>4</sub>**)**.
- **Fig. S7** Association behavior of **1<sub>2</sub>•2a<sub>4</sub>** with guest **G1**, monitored by <sup>1</sup>H NMR.
- **Fig. S8** Association behavior of a mixture of **1**, **2a**, and **G1** in various ratios, monitored by <sup>1</sup>H NMR.
- **Fig. S9** Association behavior of **1<sub>2</sub>•2a<sub>4</sub>** with **G1** in various ratios, monitored by <sup>1</sup>H NMR.
- **Fig. S10** Dilution experiments of **G1@(**1<sub>2</sub>•2a<sub>4</sub>**)**, monitored by <sup>1</sup>H NMR.
- **Fig. S11** Association behavior of **1<sub>2</sub>•2a<sub>4</sub>** with guest **G2**, monitored by <sup>1</sup>H NMR.
- **Fig. S12** Association behavior of **1<sub>2</sub>•2a<sub>4</sub>** with guest **G3**, monitored by <sup>1</sup>H NMR.
- **Fig. S13** <sup>1</sup>H-<sup>1</sup>H COSY and 2D NOESY spectra of **G3@(**1<sub>2</sub>•2a<sub>4</sub>**)**.
- **Fig. S14** Association behavior of **1<sub>2</sub>•2a<sub>4</sub>** with guest **G4**, monitored by <sup>1</sup>H NMR.
- **Fig. S15** <sup>1</sup>H NMR spectra for the competitive guest-encapsulation experiments of **1<sub>2</sub>•2a<sub>4</sub>**.
- **Fig. S16** <sup>1</sup>H NMR spectrum of self-assembled capsule **1<sub>2</sub>•(*trans*-**2b**)<sub>4</sub>**.
- **Fig. S17** Association behavior of **1<sub>2</sub>•(*trans*-**2b**)<sub>4</sub>** with **G1**, monitored by <sup>1</sup>H NMR.
- **Fig. S18** <sup>1</sup>H NMR spectral changes of **G1@[1<sub>2</sub>•(*trans*-**2b**)<sub>4</sub>]** upon 350 nm irradiation.

**General.** DMF was distilled from CaH<sub>2</sub> under an argon atmosphere. The other solvents and all commercially available reagents were used without any purification. <sup>1</sup>H and <sup>13</sup>C NMR spectra were recorded at 400 and 100 MHz, respectively, on a JEOL JNM-AL400 spectrometer. DOSY NMR spectra were recorded at 600 MHz on a JEOL JNM-ECA600 spectrometer. High resolution FD-TOF-MS measurements were performed on a JEOL JMS-T100GCV. UV-vis absorption spectra were measured on a Shimadzu UV-2450. Photoirradiation was conducted with a 300 W Xe lamp through a color filter for 350 nm or 450 nm light with ASAHI SPECTRA MAX-302. Tetra(4-pyridyl)cavitand **1** was synthesized according to the literature.<sup>1</sup>

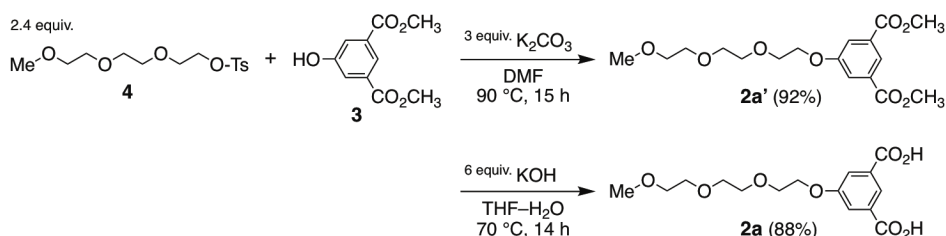

**Scheme S1** Synthetic route of **2a**.

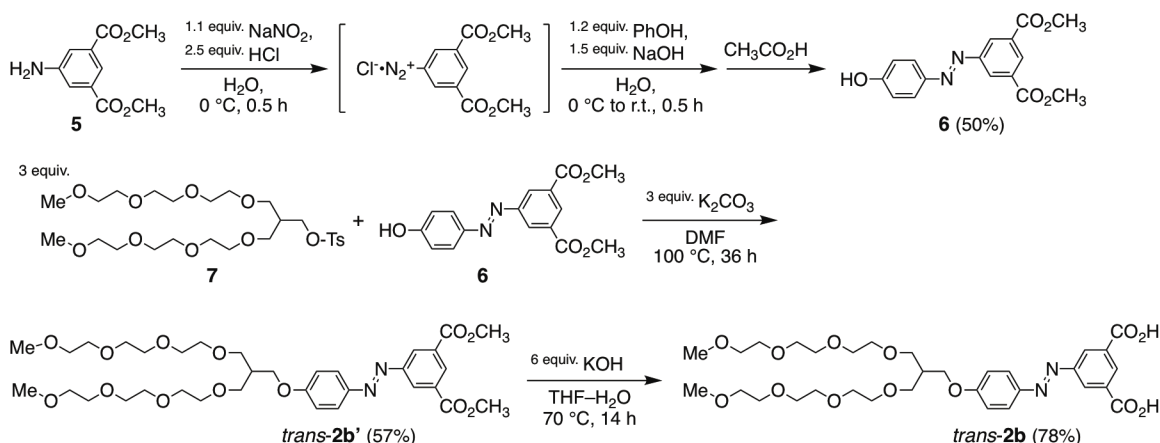

**Scheme S2** Synthetic route of *trans*-**2b**.

**Compound 2a'.** To a mixture of dimethyl 5-hydroxyisophthalate **3** (4.62 g, 22.0 mmol) and K<sub>2</sub>CO<sub>3</sub> (9.11 g, 65.9 mmol) under Ar was added a solution of the tosylate of triethylene glycol monomethyl ether (TEG) **4** (16.9 g, 53.1 mmol) in dry DMF (50 mL). The resulting mixture was stirred at 90 °C for 15 h under Ar. After cooling to room temperature, the reaction mixture was filtered and washed with EtOAc. The filtrate was partitioned between EtOAc and H<sub>2</sub>O. The organic layer was washed with H<sub>2</sub>O (5 times) and brine and dried over Na<sub>2</sub>SO<sub>4</sub>. After evaporation of solvents, the residue was purified by column chromatography on silica gel eluted with EtOAc–hexane (1:1) to give **2a'** (7.20 g, 92% yield) as a colorless oil. <sup>1</sup>H NMR (CDCl<sub>3</sub>) δ 8.29 (s, 1H), 7.78 (d, *J* = 1.5 Hz, 2H), 4.32 (t, *J* = 4.4 Hz, 2H), 3.93 (s, 6H), 3.88 (t, *J* = 4.4 Hz, 2H), 3.77–3.29 (m, 8H), 3.37 (s, 3H); <sup>13</sup>C NMR (CDCl<sub>3</sub>) δ 166.1, 159.9, 131.8, 123.1, 120.0, 71.9, 70.9, 70.7, 70.6, 69.5, 68.1, 59.0, 52.4; FD-TOF-MS *m/z* calcd for C<sub>17</sub>H<sub>24</sub>O<sub>8</sub>: 356.1471 [M]<sup>+</sup>, found: 356.1488.

**Compound 2a.** To a solution of **2a'** (7.20 g, 20.2 mmol) in THF (50 mL) was added 3 M aq. KOH (40 mL, 120 mmol). The resulting mixture was stirred at 70 °C for 14 h under Ar. After cooling to room temperature and then evaporation of THF, the reaction mixture was acidified to pH = ca. 3 with 2 M aq. HCl at 0 °C. The resulting precipitate was filtered and washed with H<sub>2</sub>O and then dried in vacuo to give **2a** (5.85 g, 88% yield) as a white solid. Mp. 128–129 °C; <sup>1</sup>H NMR

(DMSO- $d_6$ )  $\delta$  13.3 (s, 2H), 8.06 (t,  $J$  = 1.5 Hz, 1H), 7.64 (d,  $J$  = 1.5 Hz, 2H), 4.19 (t,  $J$  = 4.4 Hz, 2H), 3.76 (t,  $J$  = 4.4 Hz, 2H), 3.60–3.39 (m, 8H), 3.21 (s, 3H);  $^{13}\text{C}$  NMR (DMSO- $d_6$ )  $\delta$  166.3, 158.6, 132.6, 122.2, 119.1, 71.2, 69.9, 69.7, 69.5, 68.7, 67.8, 58.0; FD-TOF-MS  $m/z$  calcd for  $\text{C}_{15}\text{H}_{20}\text{O}_8$ : 328.1158  $[\text{M}]^+$ , found: 328.1184.

**Dimethyl *trans*-5-(4-hydroxyphenylazo)isophthalate (6).** Compound **6** was synthesized by a modified procedure of the literature.<sup>2</sup> To a suspension of dimethyl 5-aminoisophthalate **5** (3.00 g, 14.3 mmol) in  $\text{H}_2\text{O}$  (40 mL) was added 2 M aq. HCl (18 mL). To the resulting solution at 0 °C was added dropwise a solution of  $\text{NaNO}_2$  (1.09 g, 15.8 mmol) in ice cold  $\text{H}_2\text{O}$  (10 mL) over a period of 10 min. The resulting mixture was stirred at 0 °C for 20 min. To the resulting diazonium salt solution at 0 °C was added dropwise a solution of phenol (1.61 g, 17.1 mmol) in ice cold 3 M aq. NaOH solution (7 mL) over a period of 10 min. The reaction mixture was stirred and allowed to warm up to room temperature for 30 min, and then  $\text{CH}_3\text{CO}_2\text{H}$  (1.2 mL, 21 mmol) was added to the reaction mixture at 0 °C. The resulting precipitate was filtered and washed with  $\text{H}_2\text{O}$  and then dried in vacuo to give **6** (2.25 g, 50% yield) as an orange solid. Mp. 215–216 °C;  $^1\text{H}$  NMR (DMSO- $d_6$ )  $\delta$  10.51 (s, 1H), 8.48 (d,  $J$  = 1.5 Hz, 2H), 8.47 (t,  $J$  = 1.5 Hz, 1H), 7.86 (d,  $J$  = 8.8 Hz, 2H), 6.95 (d,  $J$  = 8.8 Hz, 2H), 3.92 (s, 6H);  $^{13}\text{C}$  NMR (DMSO- $d_6$ )  $\delta$  164.9, 161.9, 152.3, 145.0, 131.5, 130.4, 126.3, 125.5, 116.1, 52.7.

**Compound *trans*-2b'.** To a mixture of **6** (1.34 g, 4.26 mmol) and  $\text{K}_2\text{CO}_3$  (1.77 g, 12.8 mmol) under Ar was added a solution of the tosylate of the two dichotomous branching TEG groups **7**<sup>3</sup> (7.06 g, 12.8 mmol) in dry DMF (50 mL). The resulting mixture was stirred at 100 °C for 36 h under Ar and light shielding. After cooling to room temperature, the reaction mixture was filtered and washed with EtOAc. The filtrate was partitioned between EtOAc and  $\text{H}_2\text{O}$ . The organic layer was washed with  $\text{H}_2\text{O}$  (5 times) and brine and dried over  $\text{Na}_2\text{SO}_4$ . After evaporation of solvents, the residue was purified by column chromatography on silica gel eluted with EtOAc and then EtOAc–MeOH (100:1) to give *trans*-**2b'** (1.68 g, 57% yield) as an orange viscous oil.  $^1\text{H}$  NMR ( $\text{CDCl}_3$ )  $\delta$  8.76 (t,  $J$  = 1.5 Hz, 1H), 8.71 (d,  $J$  = 1.5 Hz, 2H), 7.97 (d,  $J$  = 8.8 Hz, 2H), 7.05 (d,  $J$  = 8.8 Hz, 2H), 4.16 (d,  $J$  = 5.9 Hz, 2H), 4.01 (s, 6H), 3.67–3.63 (m, 24H), 3.55–3.53 (m, 4H), 3.38 (s, 6H), 2.48–2.45 (m, 1H);  $^{13}\text{C}$  NMR ( $\text{CDCl}_3$ )  $\delta$  165.9, 162.4, 152.9, 146.6, 131.6, 127.5, 125.3, 114.9, 71.9, 70.68, 70.65, 70.63, 70.54, 70.51, 69.2, 66.5, 59.1, 52.6, 39.9; FD-TOF-MS  $m/z$  calcd for  $\text{C}_{34}\text{H}_{50}\text{N}_2\text{O}_{13}$ : 694.3313  $[\text{M}]^+$ , found: 694.3334.

**Compound *trans*-2b.** To a solution of **2a'** (980 mg, 1.41 mmol) in THF (30 mL) was added 3 M aq. KOH (3 mL, 9 mmol). The resulting mixture was stirred at 70 °C for 14 h under Ar and light shielding. After cooling to room temperature and then evaporation of THF, the reaction mixture was acidified to pH = ca. 3 with 2 M aq. HCl at 0 °C. The resulting precipitate was filtered and washed with  $\text{H}_2\text{O}$  and then dried in vacuo to give *trans*-**2b** (733 mg, 78% yield) as an orange viscous solid.  $^1\text{H}$  NMR ( $\text{CDCl}_3$ )  $\delta$  8.75 (s, 1H), 8.56 (s, 2H), 7.70 (d,  $J$  = 8.8 Hz, 2H), 6.92 (d,  $J$  = 8.8 Hz, 2H), 4.14–4.12 (m, 2H), 3.69–3.65 (m, 24H), 3.58–3.56 (m, 4H), 3.39 (s, 6H), 2.50–2.47 (m, 1H);  $^{13}\text{C}$  NMR ( $\text{CDCl}_3$ )  $\delta$  169.4, 162.6, 153.0, 146.8, 132.8, 131.8, 128.7, 125.7, 115.2, 72.3, 71.02, 71.00, 70.94, 70.89, 69.7, 66.7, 59.4, 40.2; FD-TOF-MS  $m/z$  calcd for  $\text{C}_{32}\text{H}_{46}\text{N}_2\text{O}_{13}$ : 666.3000  $[\text{M}]^+$ , found: 666.3029.

## References

- 1 K. Kobayashi, Y. Yamada, M. Yamanaka, Y. Sei and K. Yamaguchi, *J. Am. Chem. Soc.*, 2004, **126**, 13896–13897.
- 2 (a) S. J. Yu, S. X. Wang, Z. C. Tan, C. Q. Liao and Y. S. Li, *J. Therm. Anal. Calorim.*, 2009, **97**, 993–997; (b) A. Husain, R. Parveen and P. Dastidar, *Cryst. Growth Des.*, 2015, **15**, 5075–5085.
- 3 T. Sakano, T. Ohashi, M. Yamanaka and K. Kobayashi, *Org. Biomol. Chem.*, 2015, **13**, 8359–8364.



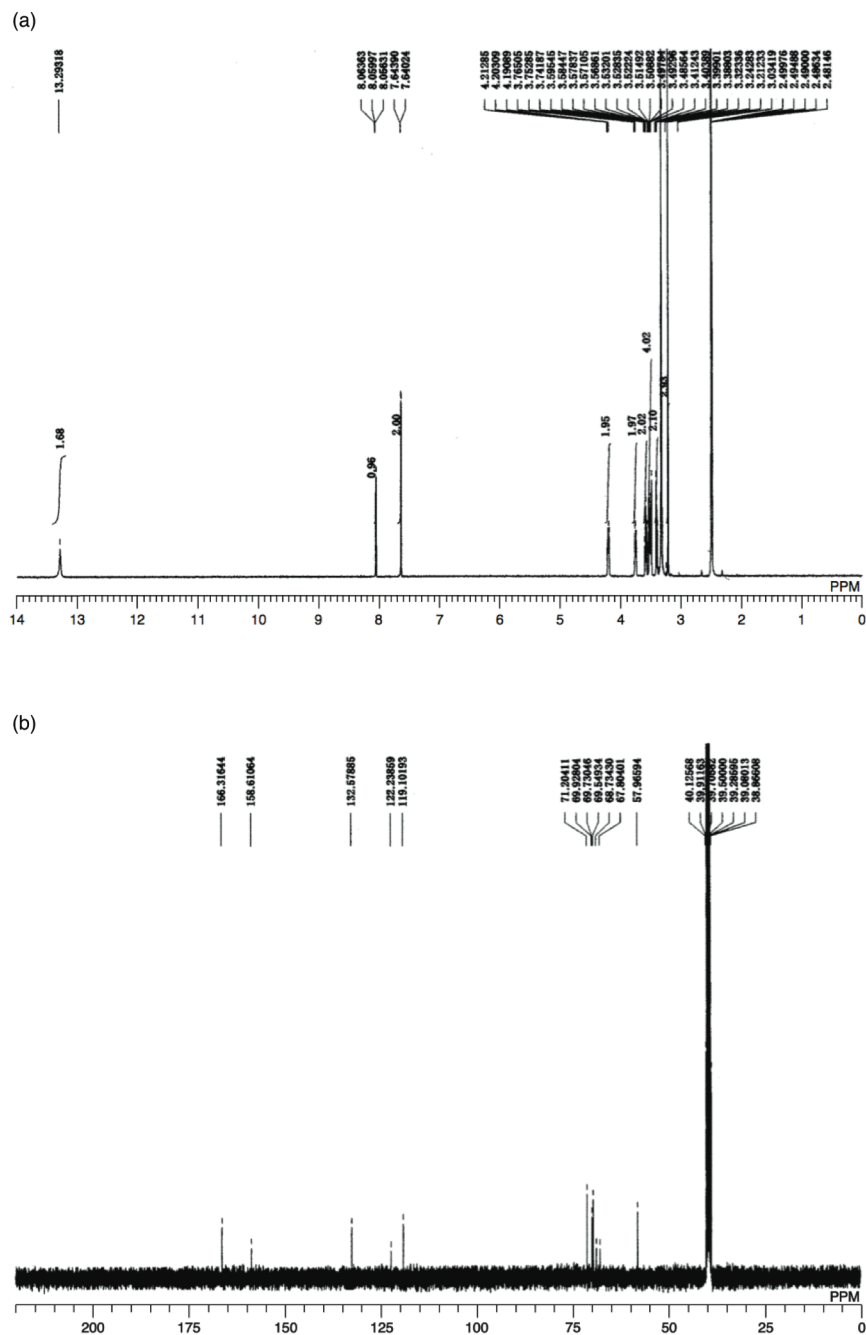

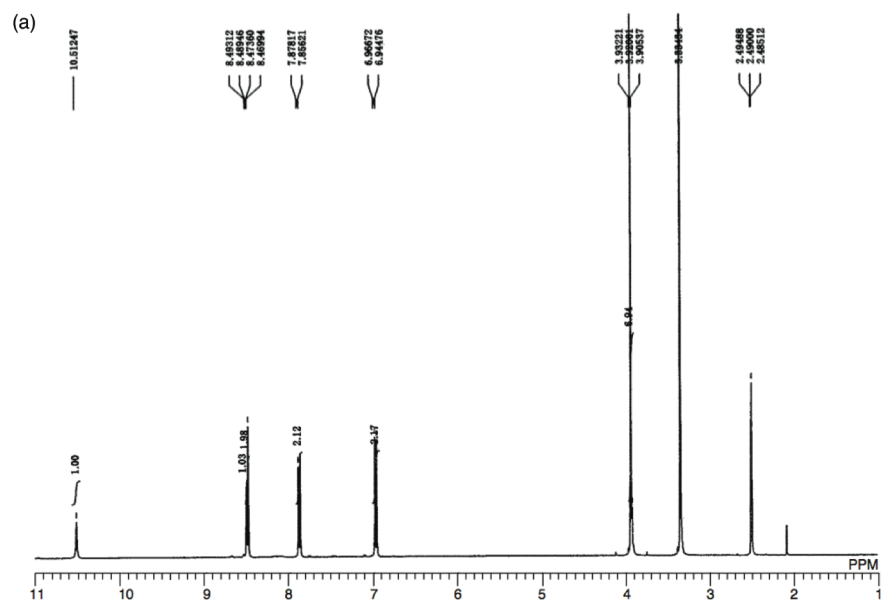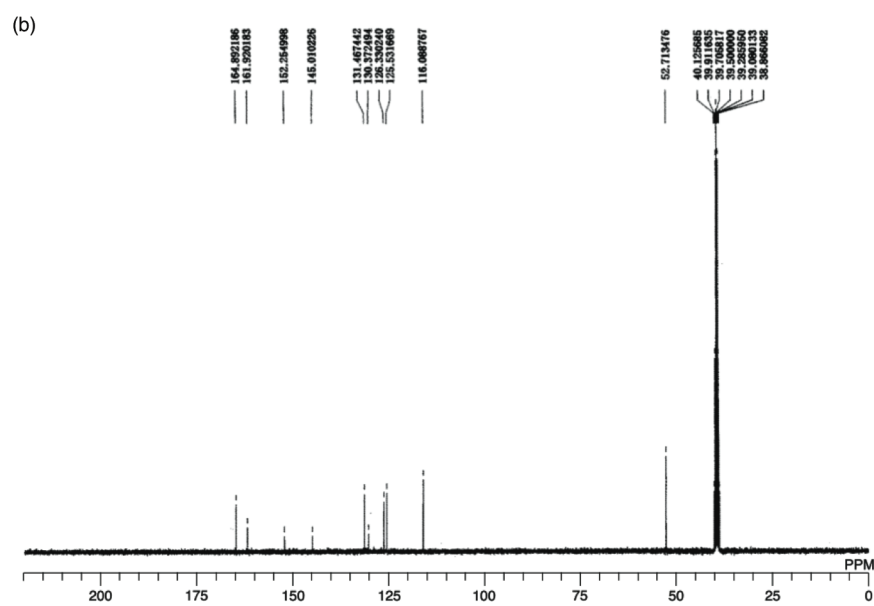

**Fig. S3** (a)  $^1\text{H}$  NMR and (b)  $^{13}\text{C}$  NMR spectra of **6** in  $\text{DMSO-}d_6$ .

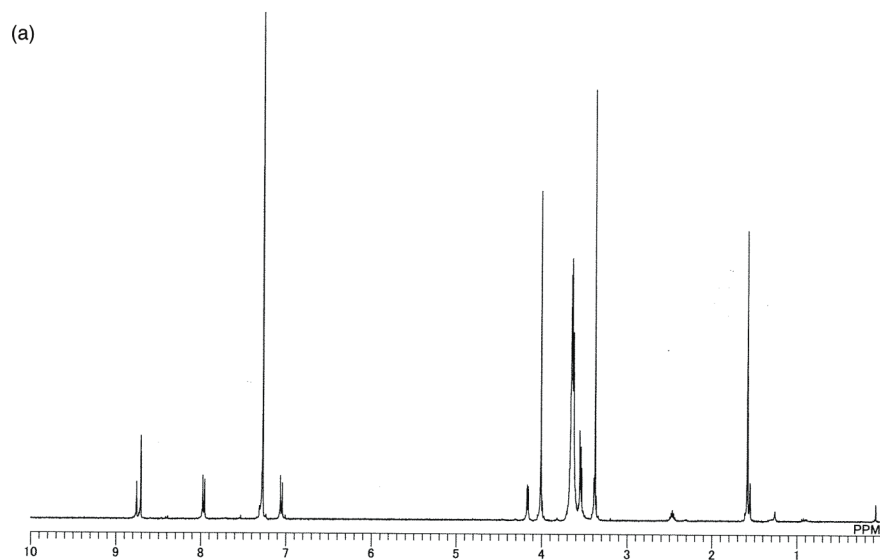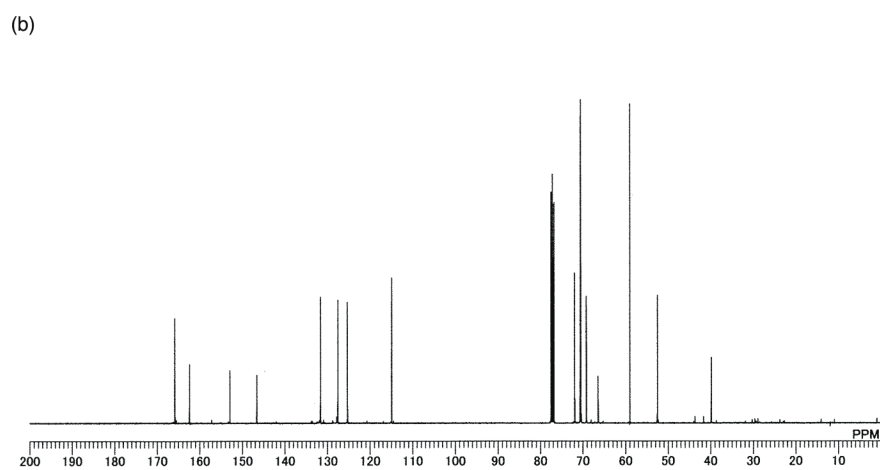

**Fig. S4** (a)  $^1\text{H}$  NMR and (b)  $^{13}\text{C}$  NMR spectra of *trans*-**2b'** in  $\text{CDCl}_3$ .

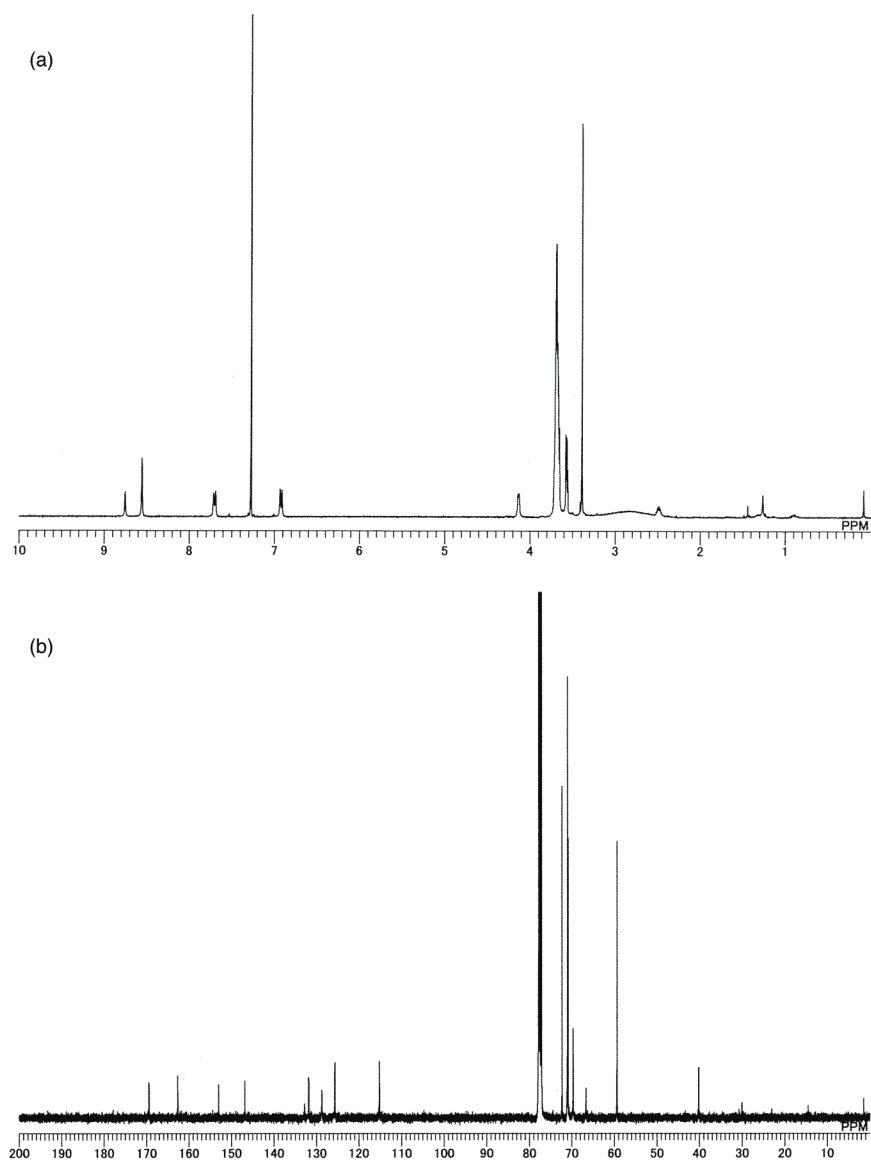

**Fig. S5** (a)  $^1\text{H}$  NMR and (b)  $^{13}\text{C}$  NMR spectra of *trans*-2b in  $\text{CDCl}_3$ .



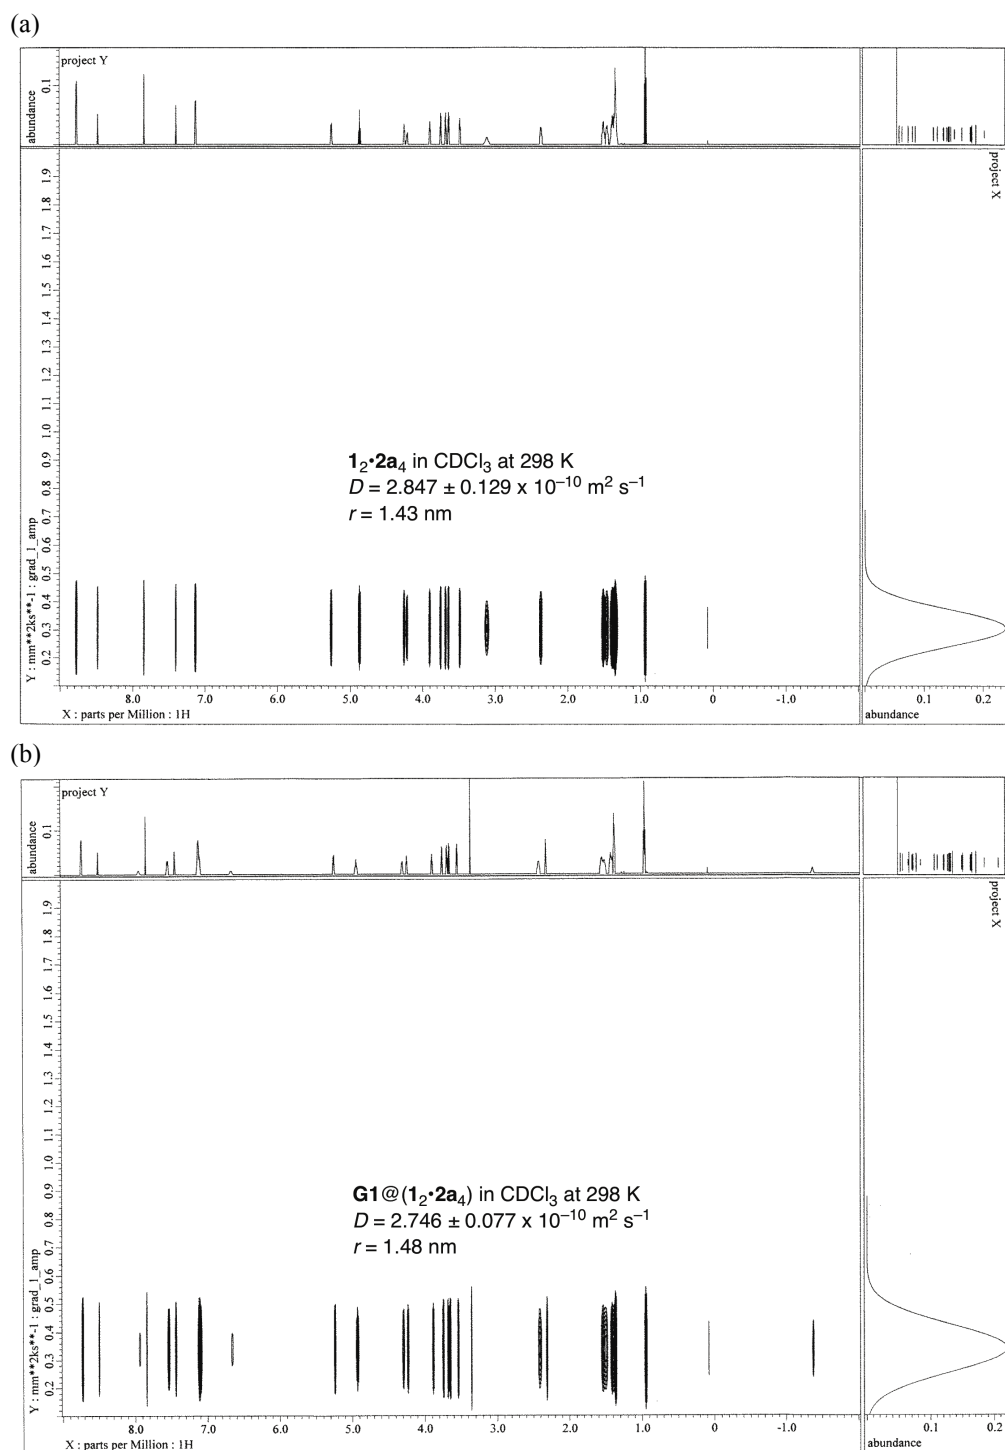

**Fig. S6** DOSY NMR spectra (600 MHz) of (a) **1<sub>2</sub>•2a<sub>4</sub>** (2 mM: [**1**] = 4 mM and [**2a**] = 8 mM) and (b) **G1@(1<sub>2</sub>•2a<sub>4</sub>)** (2 mM: [**1**] = 4 mM, [**2a**] = 8 mM, and [**G1**] = 6 mM) in CDCl<sub>3</sub> at 298 K. Diffusion time = 200 ms. Grad 1 = 1.1 ms. Grad 1 amp = 0.010 ~ 0.290 T/m, 16 points. Relaxation delay = 7 s.

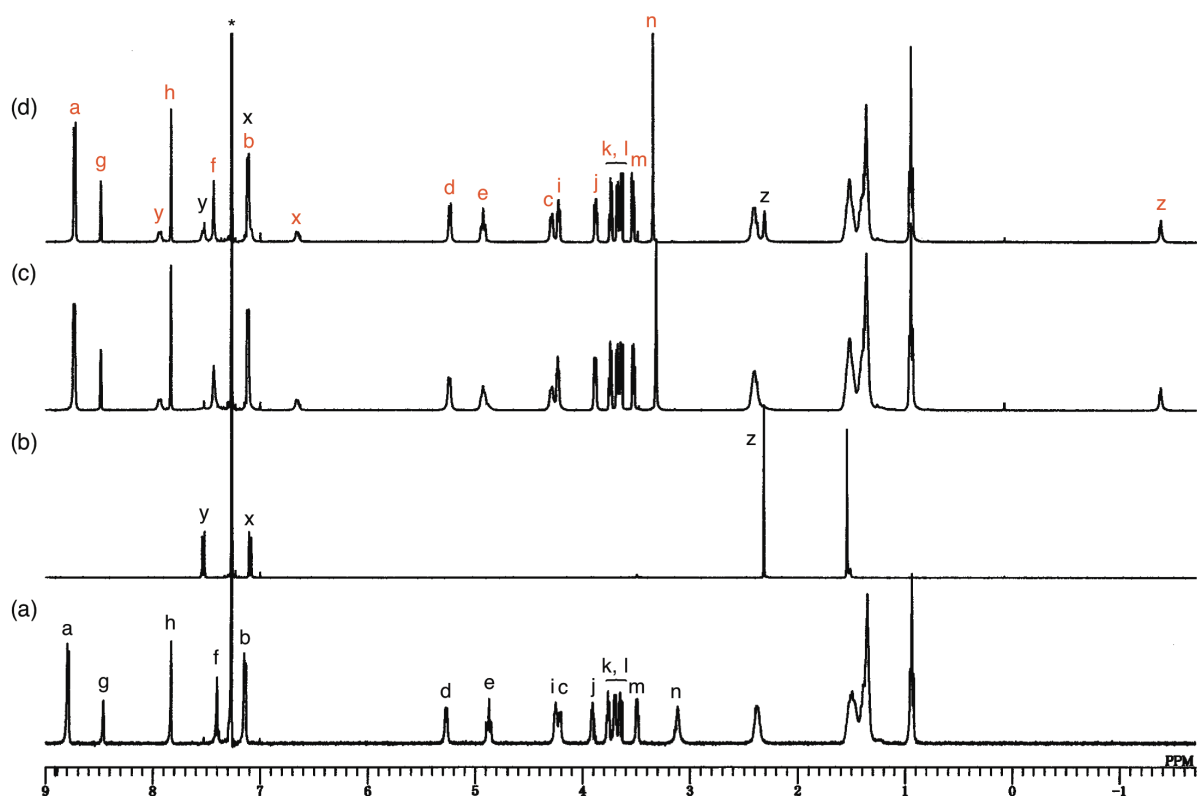

**Fig. S7** Association behavior of self-assembled capsule  $1_2\cdot 2a_4$  (2 mM) with guest **G1**, monitored by  $^1\text{H}$  NMR ( $\text{CDCl}_3$ , 298 K): (a)  $1_2\cdot 2a_4$  alone, (b) **G1** alone, (c)  $1_2\cdot 2a_4$  + **G1** (1 equiv), and (d)  $1_2\cdot 2a_4$  + **G1** (2 equiv). The marked signals are assigned in Scheme 1a,c. The representative signals of free **G1** and guest-free  $1_2\cdot 2a_4$  are shown in black, and the representative signals of **G1**@( $1_2\cdot 2a_4$ ) are shown in red. The asterisk is the residual solvent signal.

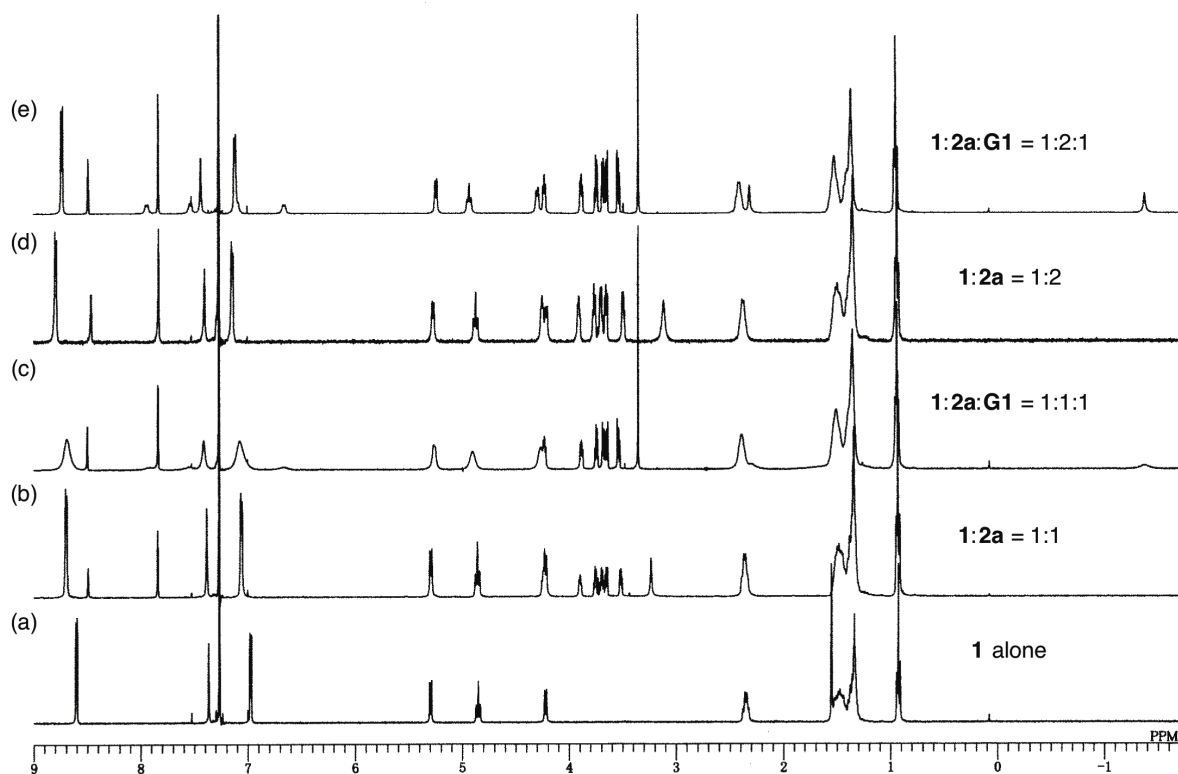

**Fig. S8** Association behavior of a mixture of **1**, **2a**, and **G1** in various ratios, monitored by  $^1\text{H}$  NMR ( $\text{CDCl}_3$ , 298 K): (a) **1** alone, (b)  $[\mathbf{1}] = 4 \text{ mM}$  and  $[\mathbf{2a}] = 4 \text{ mM}$ , (c)  $[\mathbf{1}] = 4 \text{ mM}$ ,  $[\mathbf{2a}] = 4 \text{ mM}$ , and  $[\mathbf{G1}] = 4 \text{ mM}$ , (d)  $[\mathbf{1}] = 4 \text{ mM}$  and  $[\mathbf{2a}] = 8 \text{ mM}$  ( $[\mathbf{1}_2\cdot \mathbf{2a}_4] = 2 \text{ mM}$ ), and (e)  $[\mathbf{1}] = 4 \text{ mM}$ ,  $[\mathbf{2a}] = 8 \text{ mM}$ , and  $[\mathbf{G1}] = 4 \text{ mM}$  (**G1**@( $1_2\cdot 2a_4$ ) + **G1**).

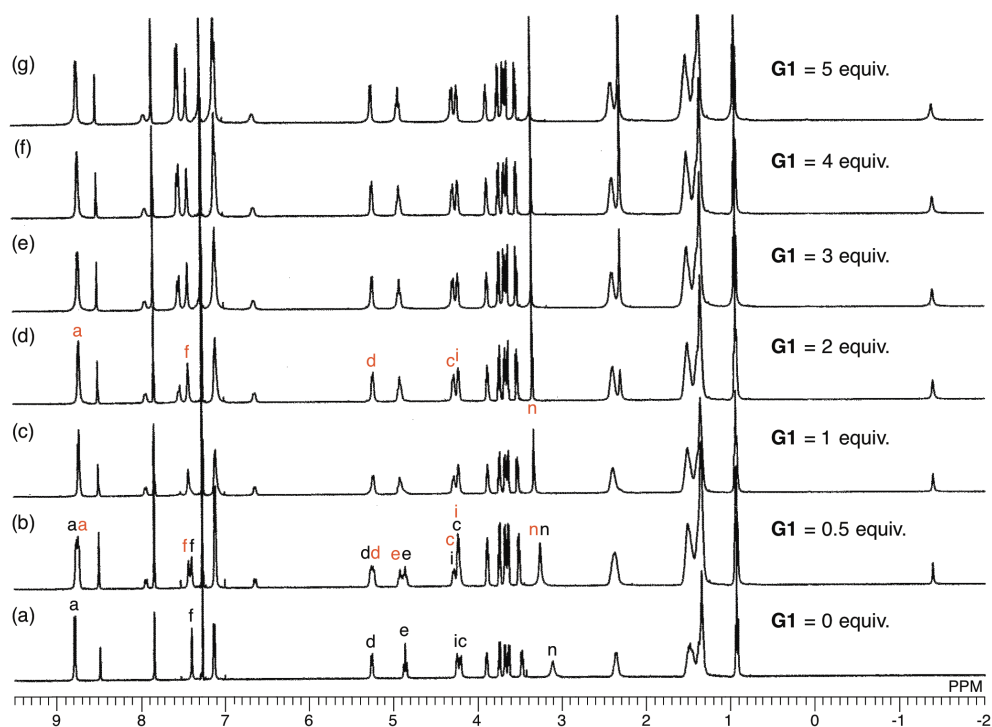

**Fig. S9** Association behavior of self-assembled capsule  $1_2\cdot 2a_4$  (2 mM) with guest **G1** in various ratios, monitored by  $^1\text{H}$  NMR ( $\text{CDCl}_3$ , 298 K): (a)  $1_2\cdot 2a_4$  alone, (b)  $1_2\cdot 2a_4 + \text{G1}$  (0.5 equiv), (c)  $1_2\cdot 2a_4 + \text{G1}$  (1 equiv), (d)  $1_2\cdot 2a_4 + \text{G1}$  (2 equiv), (e)  $1_2\cdot 2a_4 + \text{G1}$  (3 equiv), (f)  $1_2\cdot 2a_4 + \text{G1}$  (4 equiv), and (g)  $1_2\cdot 2a_4 + \text{G1}$  (5 equiv). The marked signals are assigned in Scheme 1a,c. The representative signals of guest-free  $1_2\cdot 2a_4$  and  $\text{G1}@ (1_2\cdot 2a_4)$  are shown in black and red, respectively.

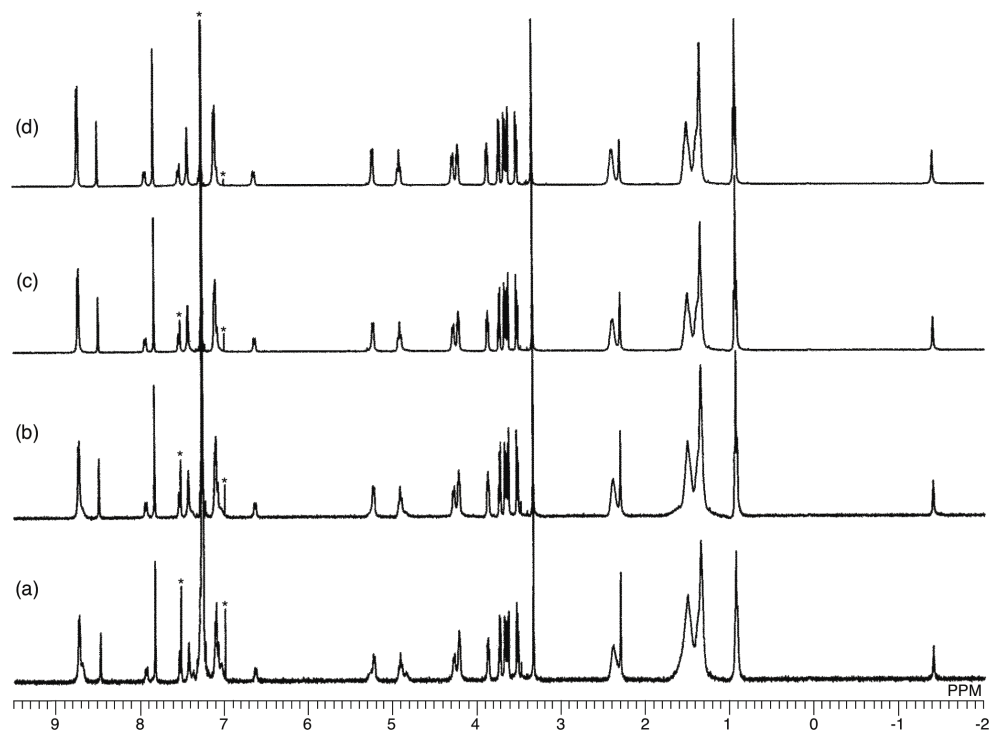

**Fig. S10** Dilution experiments of  $\text{G1}@ (1_2\cdot 2a_4)$  (2–0.25 mM), monitored by  $^1\text{H}$  NMR ( $\text{CDCl}_3$ , 298 K), wherein  $1:2a:\text{G1}$  ratio is constant with 1:2:1: (a)  $[1] = 0.5 \text{ mM}$ ,  $[2a] = 1 \text{ mM}$ , and  $[\text{G1}] = 0.5 \text{ mM}$ , (b)  $[1] = 1 \text{ mM}$ ,  $[2a] = 2 \text{ mM}$ , and  $[\text{G1}] = 1 \text{ mM}$ , (c)  $[1] = 2 \text{ mM}$ ,  $[2a] = 4 \text{ mM}$ , and  $[\text{G1}] = 2 \text{ mM}$ , and (d)  $[1] = 4 \text{ mM}$ ,  $[2a] = 8 \text{ mM}$ , and  $[\text{G1}] = 4 \text{ mM}$ . Asterisks are the residual solvent signal and its satellite signal.

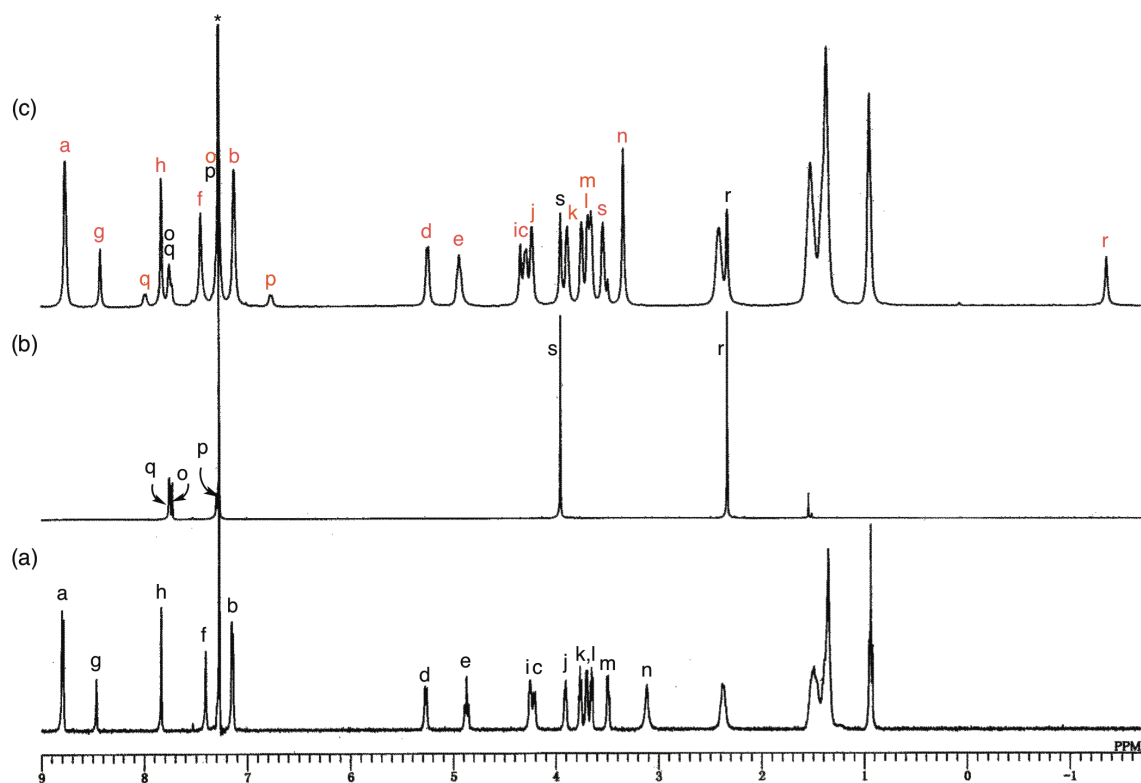

**Fig. S11** Association behavior of self-assembled capsule  $1_2\cdot 2a_4$  (2 mM) with guest **G2**, monitored by  $^1\text{H}$  NMR ( $\text{CDCl}_3$ , 298 K): (a)  $1_2\cdot 2a_4$  alone, (b) **G2** alone, and (c)  $1_2\cdot 2a_4$  + **G2** (2 equiv). The marked signals are assigned in Scheme 1a,c. The representative signals of free **G2** and guest-free  $1_2\cdot 2a_4$  are shown in black, and the representative signals of  $\text{G2}@ (1_2\cdot 2a_4)$  are shown in red. The asterisk is the residual solvent signal.

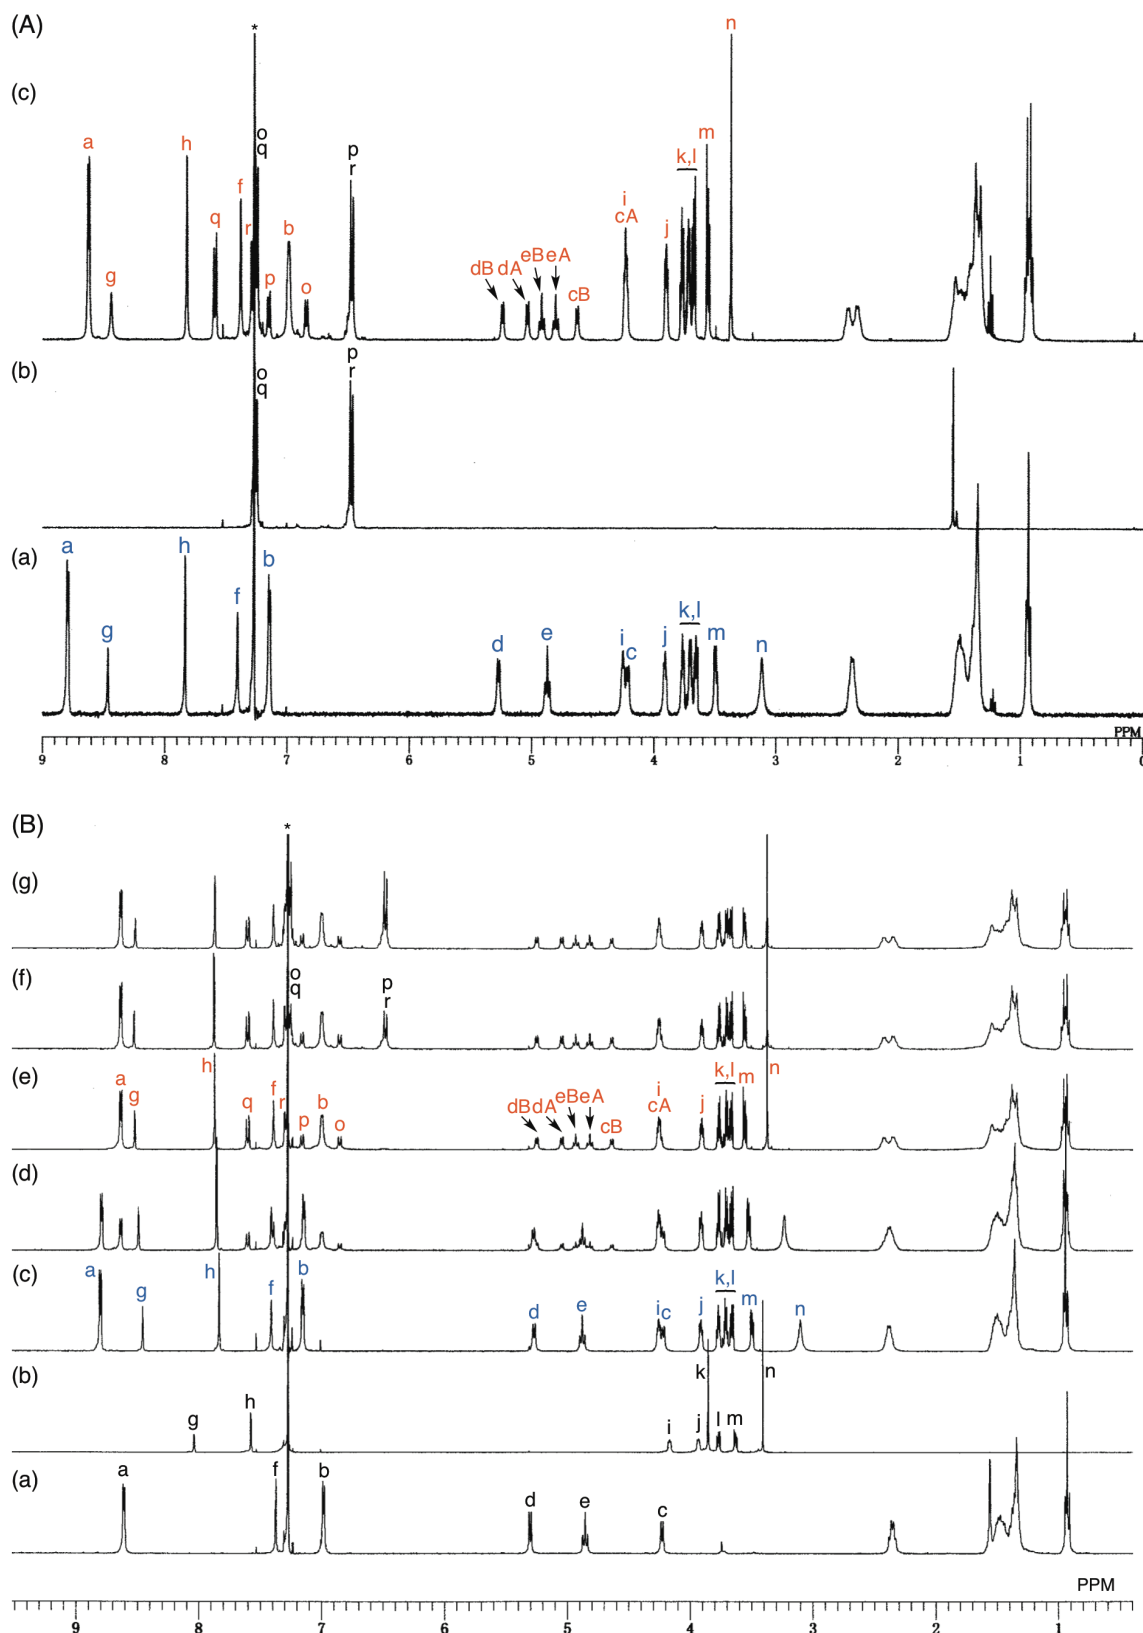

**Fig. S12** Association behavior of self-assembled capsule  $1_2\cdot 2a_4$  (2 mM) with guest **G3**, monitored by  $^1\text{H}$  NMR ( $\text{CDCl}_3$ , 298 K).

(A) (a)  $1_2\cdot 2a_4$  alone, (b) **G3** alone, and (c)  $1_2\cdot 2a_4$  + **G3** (2 equiv). The marked signals are assigned in Scheme 1a,c and Fig. 4. The representative signals of free **G3** and guest-free  $1_2\cdot 2a_4$  are shown in black and blue, respectively, and the representative signals of **G3**@( $1_2\cdot 2a_4$ ) are shown in red. The asterisk is the residual solvent signal.

(B) (a) **1** alone, (b) **2a** alone, (c)  $1_2\cdot 2a_4$  alone, (d)  $1_2\cdot 2a_4$  + **G3** (0.5 equiv), (e)  $1_2\cdot 2a_4$  + **G3** (1 equiv), (f)  $1_2\cdot 2a_4$  + **G3** (2 equiv), and (g)  $1_2\cdot 2a_4$  + **G3** (3 equiv). The representative signals of free **1** and free **2a** are also shown in black.

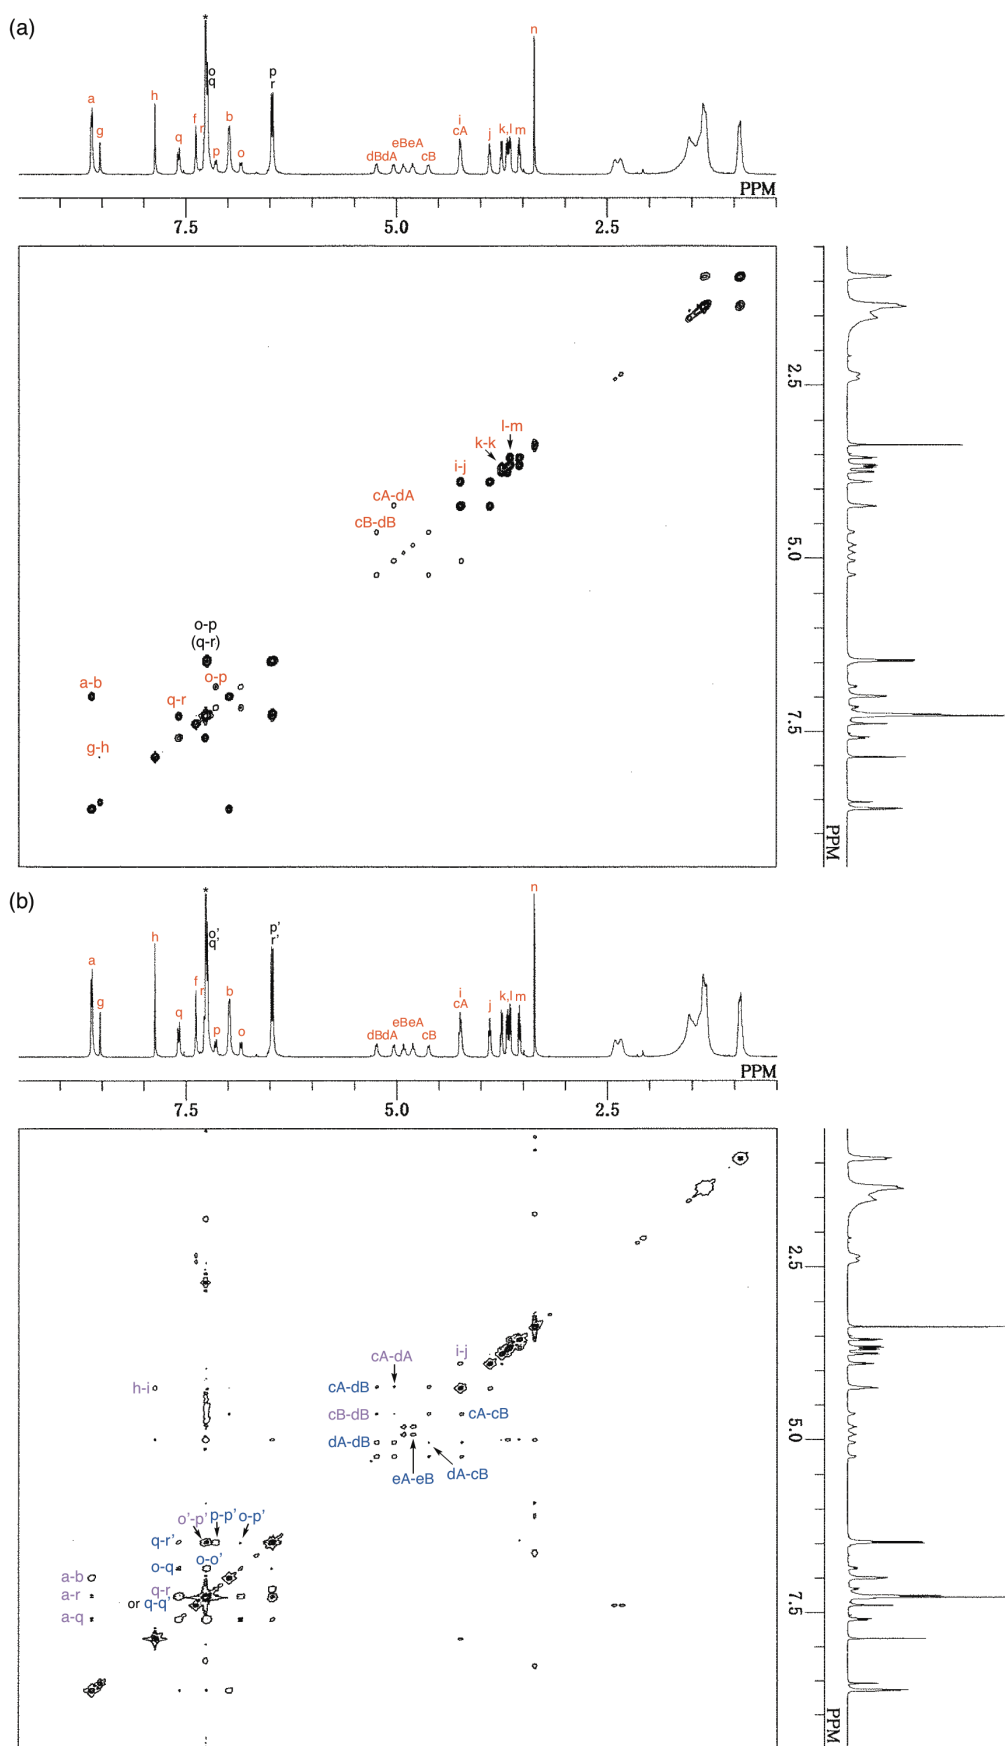

**Fig. S13** (a)  $^1\text{H}$ - $^1\text{H}$  COSY spectrum of a mixture of  $\mathbf{1_2\cdot 2a_4}$  (2 mM) and  $\text{G3}$  (4 mM) in  $\text{CDCl}_3$  at 298 K. The representative signals of free  $\text{G3}$  and  $\text{G3}@(\mathbf{1_2\cdot 2a_4})$  are shown in black and red, respectively. (b) 2D NOESY spectrum (mixing time = 0.4 s and pulse delay = 1.5 s) of a mixture of  $\mathbf{1_2\cdot 2a_4}$  (2 mM) and  $\text{G3}$  (4 mM) in  $\text{CDCl}_3$  at 298 K. Assignments of NOE correlations and exchange cross-peaks are shown in purple and blue, respectively.

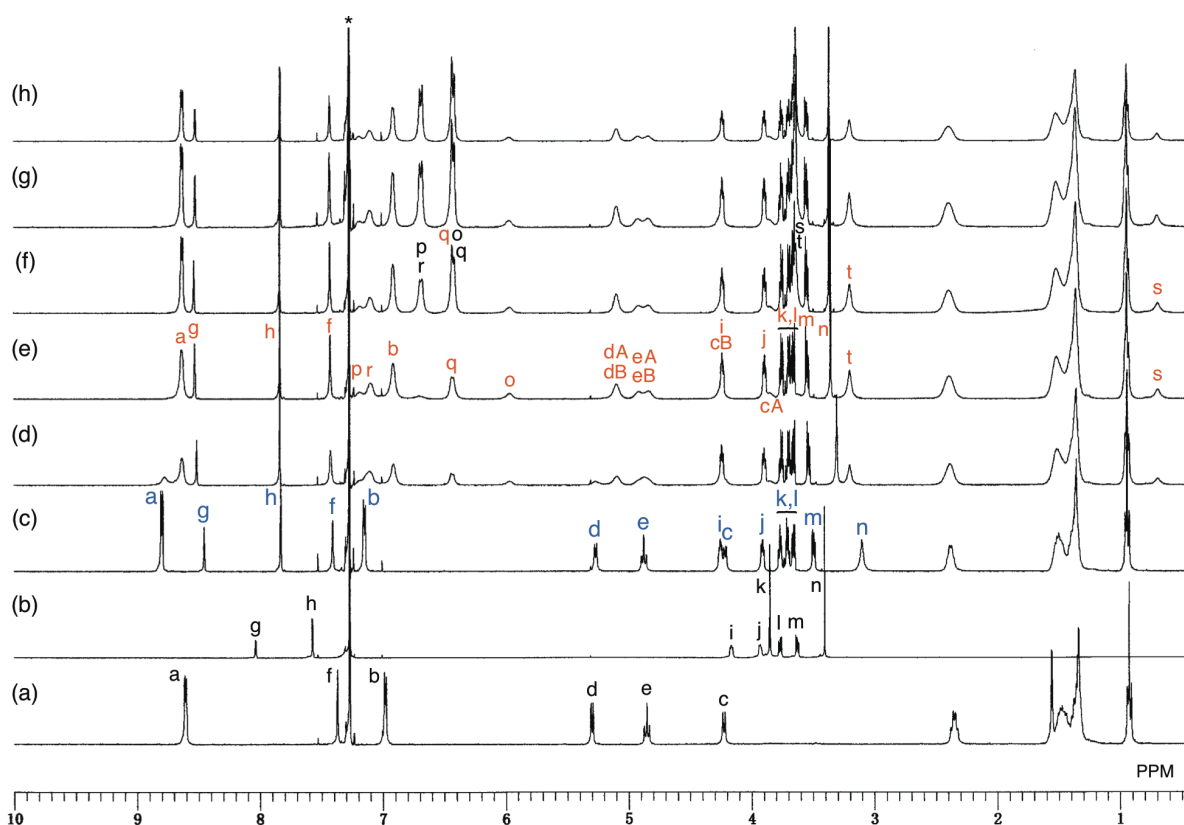

**Fig. S14** Association behavior of self-assembled capsule  $1_2\cdot 2a_4$  (2 mM) with guest **G4**, monitored by  $^1\text{H}$  NMR ( $\text{CDCl}_3$ , 298 K): (a) **1** alone, (b) **2a** alone, (c)  $1_2\cdot 2a_4$  alone, (d)  $1_2\cdot 2a_4$  + **G4** (0.5 equiv), (e)  $1_2\cdot 2a_4$  + **G4** (1 equiv), (f)  $1_2\cdot 2a_4$  + **G4** (2 equiv), and (g)  $1_2\cdot 2a_4$  + **G4** (3 equiv); (h)  $1_2\cdot 2a_4$  + **G4** (3 equiv) after heating 50 °C for 24 h. The marked signals are assigned in Scheme 1a,c (see also Fig. 4). The representative signals of free **G4** and guest-free  $1_2\cdot 2a_4$  are shown in black and blue, respectively, and the representative signals of **G4**@( $1_2\cdot 2a_4$ ) are shown in red. The representative signals of free **1** and free **2a** are also shown in black. The asterisk is the residual solvent signal.

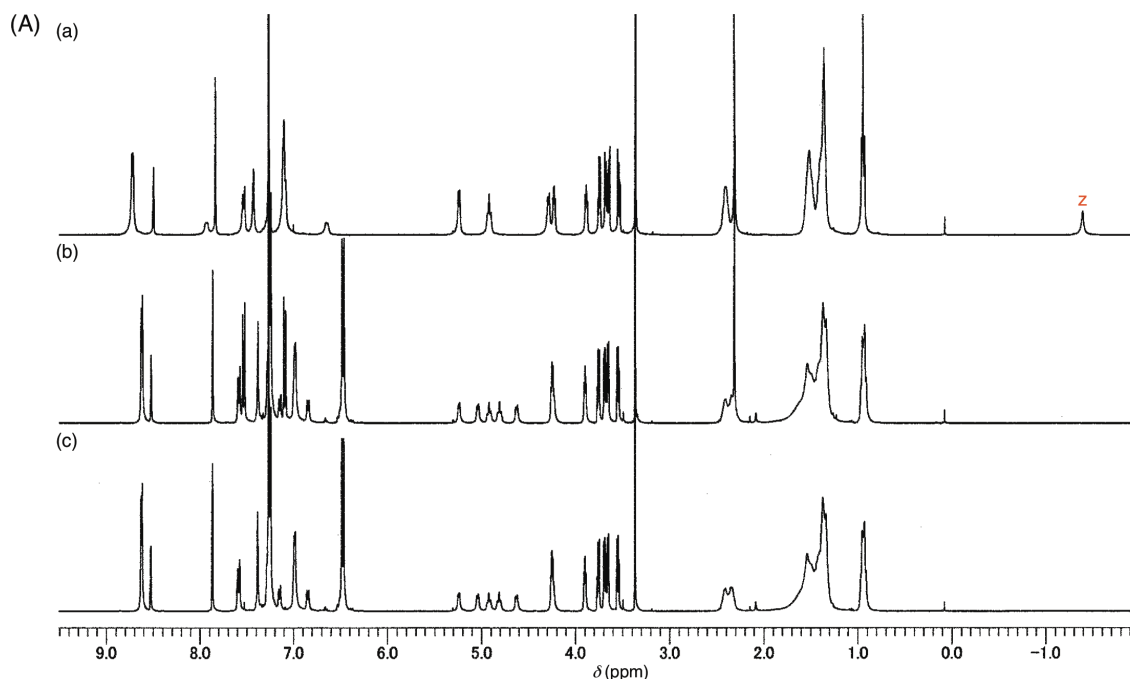

**Fig. S15**  $^1\text{H}$  NMR spectra ( $\text{CDCl}_3$ , 298 K) for the competitive guest-encapsulation experiments of  $1_2\cdot 2a_4$ . (A) (a)  $1_2\cdot 2a_4$  (2 mM) and **G1** (6 mM) (**G1**@( $1_2\cdot 2a_4$ ) and free **G1**), (b) a mixture of  $1_2\cdot 2a_4$  (2 mM), **G1** (6 mM), and **G3** (4 mM), and (c)  $1_2\cdot 2a_4$  (2 mM) and **G3** (4 mM) (**G3**@( $1_2\cdot 2a_4$ ) and free **G3**).

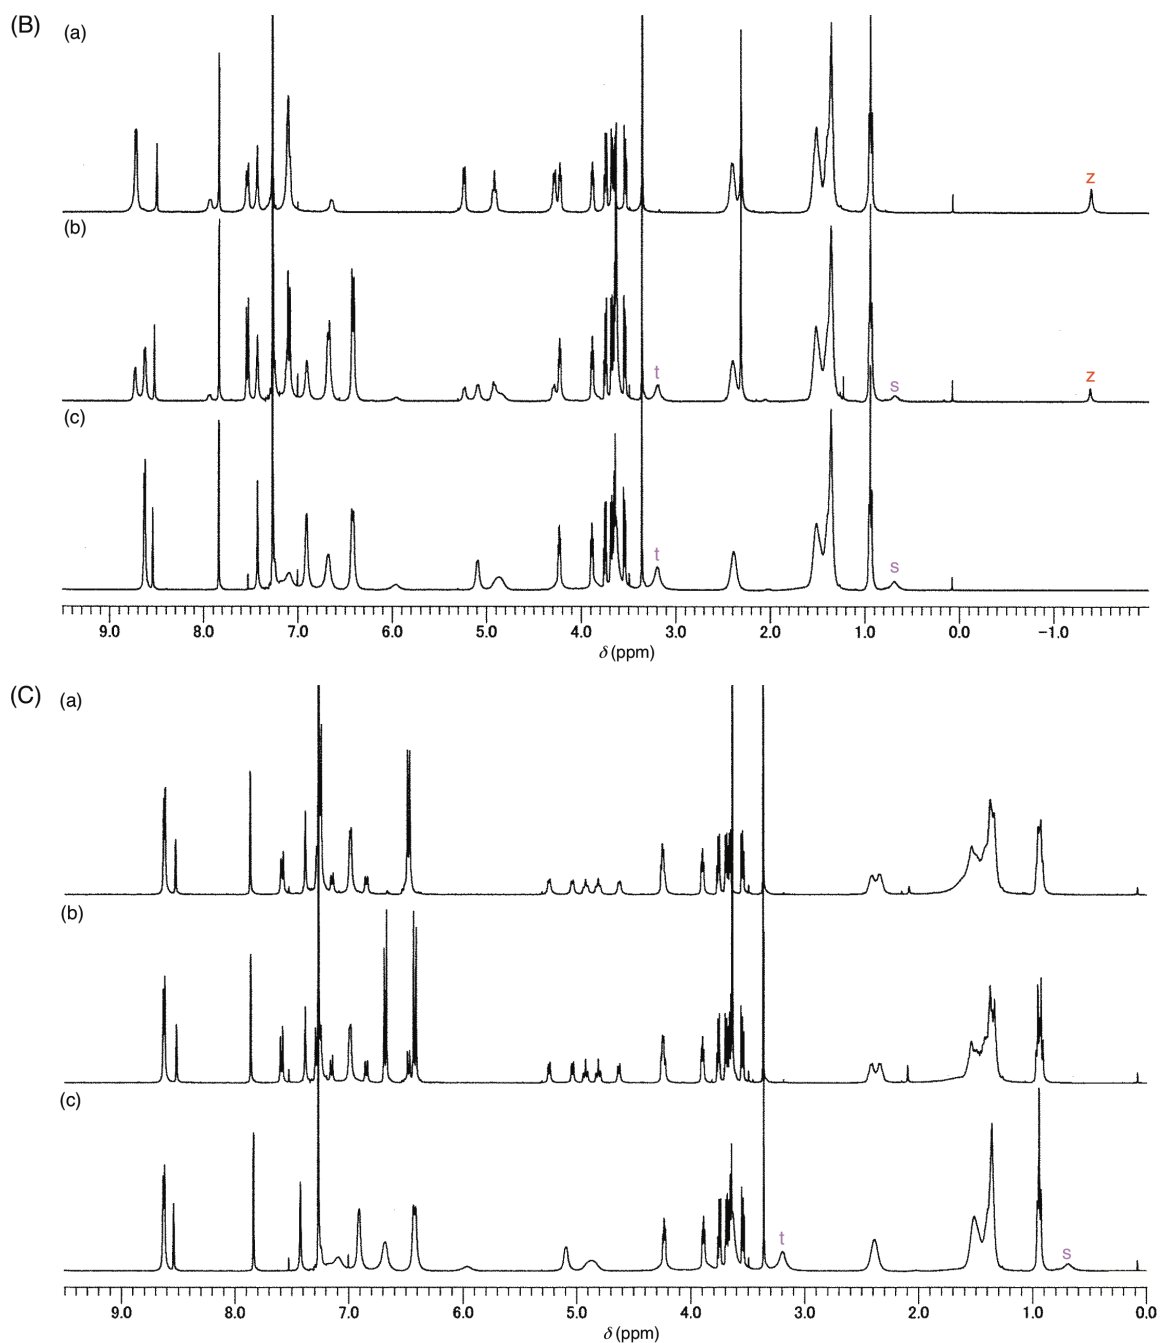

**Fig. S15 (continued)**  $^1\text{H}$  NMR spectra ( $\text{CDCl}_3$ , 298 K) for the competitive guest-encapsulation experiments of  $1_2\cdot 2a_4$ . (B) (a)  $1_2\cdot 2a_4$  (2 mM) and **G1** (6 mM) (**G1**@( $1_2\cdot 2a_4$ ) and free **G1**), (b) a mixture of  $1_2\cdot 2a_4$  (2 mM), **G1** (6 mM), and **G4** (4 mM), and (c)  $1_2\cdot 2a_4$  (2 mM) and **G4** (4 mM) (**G4**@( $1_2\cdot 2a_4$ ) and free **G4**). (C) (a)  $1_2\cdot 2a_4$  (2 mM) and **G3** (4 mM) (**G3**@( $1_2\cdot 2a_4$ ) and free **G3**), (b) a mixture of  $1_2\cdot 2a_4$  (2 mM), **G3** (4 mM), and **G4** (4 mM), and (c)  $1_2\cdot 2a_4$  (2 mM) and **G4** (4 mM) (**G4**@( $1_2\cdot 2a_4$ ) and free **G4**).



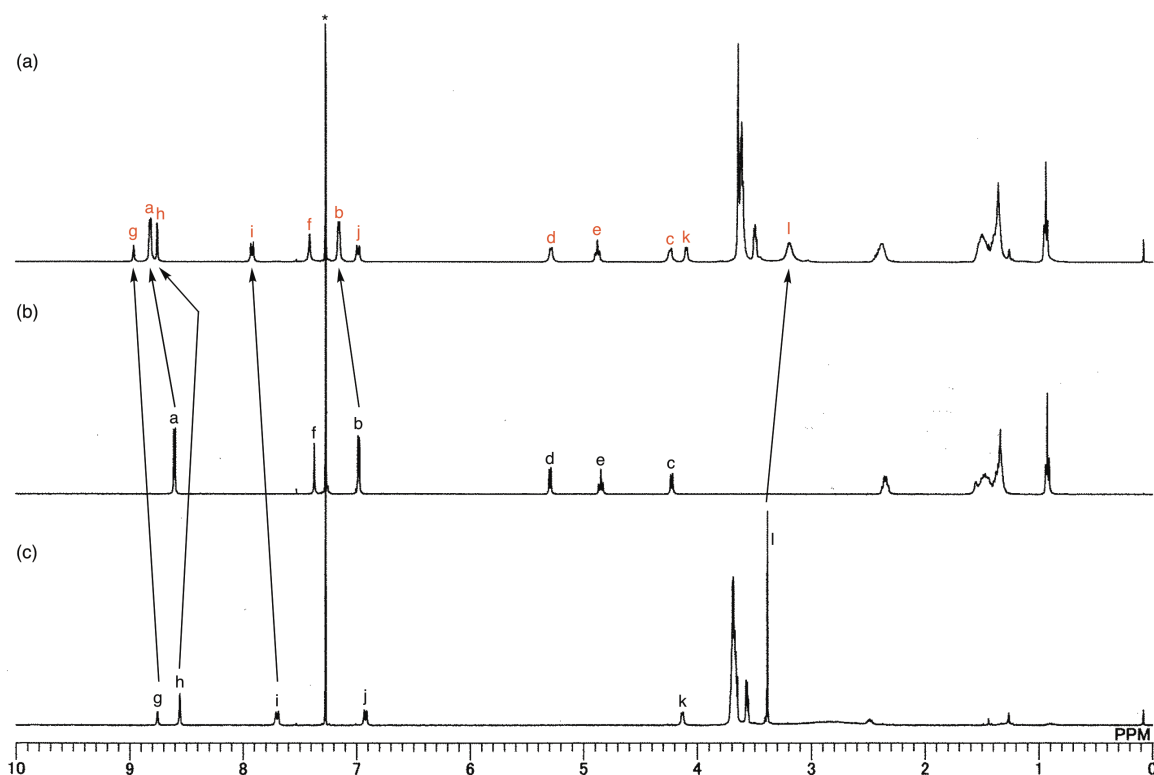

**Fig. S16**  $^1\text{H}$  NMR spectra (CDCl<sub>3</sub>, 298 K) of (a) self-assembled capsule  $1_2\bullet(\text{trans-2b})_4$  ([**1**] = 4 mM and [*trans-2b*] = 8 mM), (b) **1** alone, and (c) *trans-2b* alone. The signals marked a–l are assigned in Scheme 2a. The representative signals of free species and capsule  $1_2\bullet(\text{trans-2b})_4$  are shown in black and red, respectively. Asterisk is the residual solvent signal.

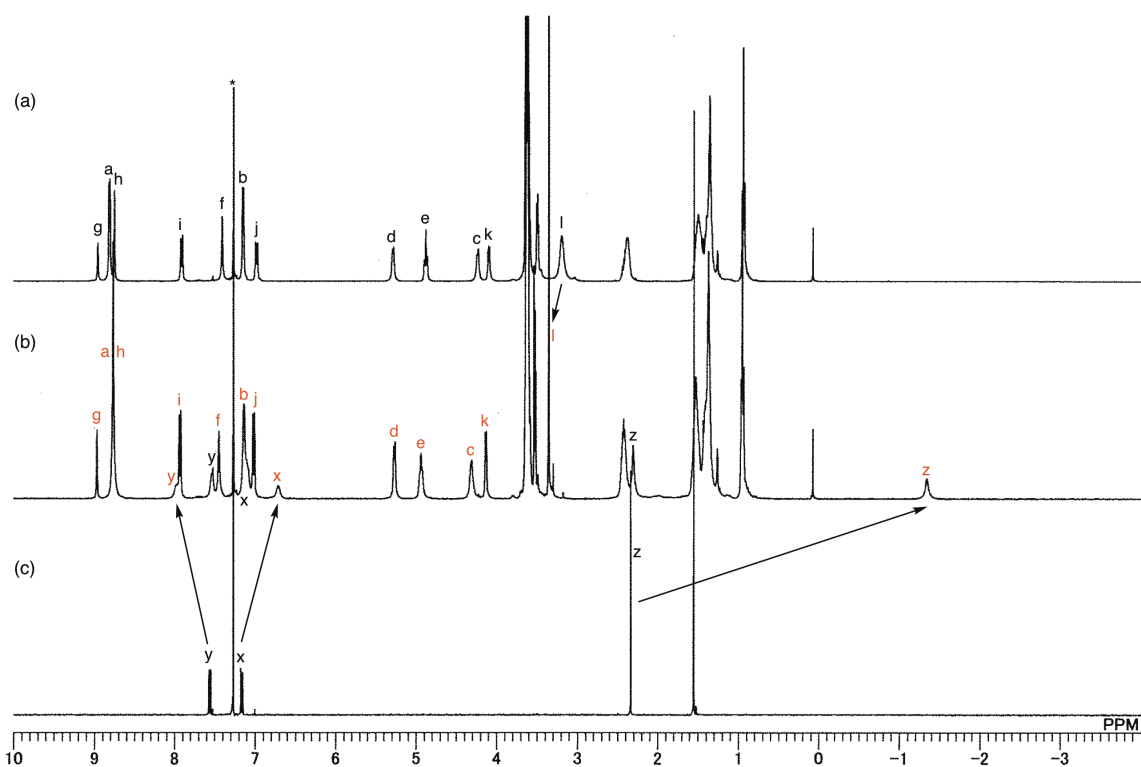

**Fig. S17** Association behavior of self-assembled capsule  $1_2\bullet(\text{trans-2b})_4$  (2 mM) with guest **G1**, monitored by  $^1\text{H}$  NMR (CDCl<sub>3</sub>, 298 K): (a)  $1_2\bullet(\text{trans-2b})_4$  alone, (b)  $1_2\bullet(\text{trans-2b})_4$  + **G1** (2 equiv), and (c) **G1** alone. The marked signals are assigned in Scheme 2a. The representative signals of free **G1** and guest-free  $1_2\bullet(\text{trans-2b})_4$  are shown in black, and the representative signals of **G1**@ $[1_2\bullet(\text{trans-2b})_4]$  are shown in red. The asterisk is the residual solvent signal.

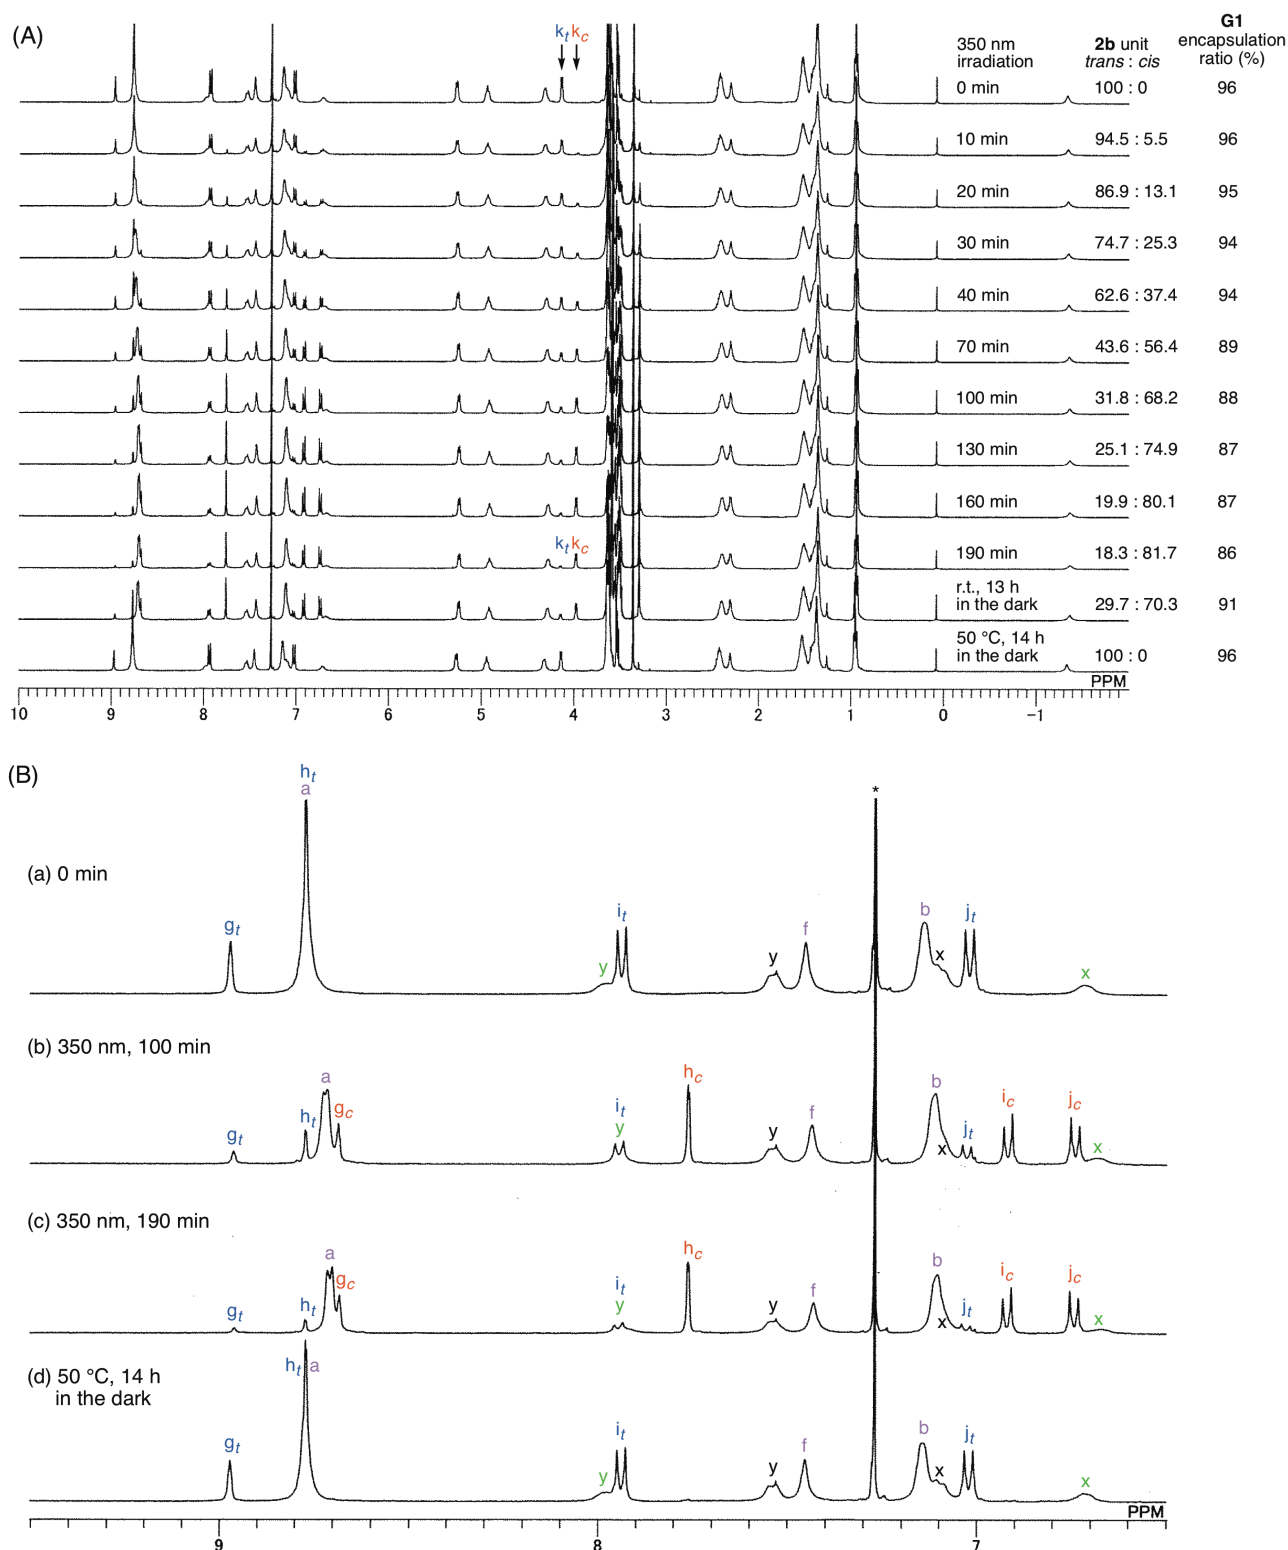

**Fig. S18**  $^1\text{H}$  NMR spectral changes ( $\text{CDCl}_3$ , 298 K) of  $\text{G1}@[1_2\cdot(\text{trans-2b})_4]$  (initial state:  $[1_2\cdot(\text{trans-2b})_4]_{\text{initial}} = 2 \text{ mM}$  and  $[\text{G1}]_{\text{initial}} = 4 \text{ mM}$ ) upon 350 nm irradiation with a 300 W Xe lamp through a color filter for 350 nm light.

(A) Full spectra with *trans*:*cis* ratios of the subunit **2b** and **G1**-encapsulation ratios as a function of 350 nm irradiation time (min) and upon thermal reversion under light shielding.

(B) Selective spectra of Fig. S18A in the region between 9.5 and 6.5 ppm: (a) before irradiation, (b) after irradiation for 100 min, (c) after irradiation for 190 min, and (d) after heating at 50 °C for 14 h under light shielding. The signals marked a–l and x–z are assigned in Scheme 2a. The representative signals of the subunit **1** are shown in purple, and the representative signals of free and encapsulated **G1** are shown in black and green, respectively. The representative signals of the subunits *trans-2b* and *cis-2b* are shown in blue and red, respectively. The subscript ‘*t*’ and ‘*c*’ indicate the subunits *trans-2b* and *cis-2b*, respectively. Asterisk is the residual solvent signal.
